# Supplementary material for: Evolutionary structure prediction-assisted design of anode materials for Ca-ion battery based on phosphorene
Source: Royal Society of Chemistry journal article supplement (doi:10.1039/d1cp00094b), 2021-01-01
Supplement: d1cp00094b1.pdf [file d1cp00094b1.pdf]

## Supporting Information

### **Evolutionary structure predicted assisted design of anode materials for Ca-ion battery based on phosphorene**

*Chandra Chowdhury, Pranab Gain, Ayan Datta\**

School of Chemical Sciences, Indian Association for the Cultivation of Science, Jadavpur – 700032,  
West Bengal (India).

**\* To whom correspondence should be addressed.**

**Email: [spad@iacs.res.in](mailto:spad@iacs.res.in)**

## Contents

1. Cartesian coordinates for the allotropes of phosphorene.
2. Fully calcinated structures of alpha, gamma and delta phases of phosphorene.
3. Variation of binding energy with Ca content of  $\delta$ -phase of phosphorene.
4. Detailed minimum energy pathway of Ca diffusion along armchair and zigzag direction of  $\alpha$  allotrope.
5. Detailed minimum energy pathway of Ca diffusion along zigzag direction of  $\gamma$  allotrope.
6. Structure of saddle points during Ca diffusion along zigzag direction of  $\gamma$  allotrope.
7. Convergence test of k-point mesh for  $\alpha$ -phase.
8. Cartesian co-ordinates for the structures generated using evolutionary structure prediction algorithm with lattice parameters and their corresponding energies calculated using plane wave methods (DFT-D2).
9. Phonon spectrums of other two structures originated from evolutionary structure prediction algorithm.
10. Convex curve taking possible phases of all the 2319 structures.
11. RMSD plots for  $\text{Ca}_3\text{P}_2$  and  $\text{Ca}_4\text{P}_4$ .

1. Cartesian coordinates for the allotropes of phosphorene.

(A)  $\alpha$  Pn

P 1.675407887 0.382691860 6.375204086

P 0.000000000 1.862238646 6.375204086

P 1.675407887 4.107169151 4.263043404

P 0.000000000 2.627622366 4.263043404

a=3.35 Å, b= 4.49 Å.

(B)  $\beta$  Pn

P 0.66481257 1.72061050 4.78454992

P -0.97963745 2.67011927 3.54986464

a=3.28897 Å, b= 3.28897 Å.

(C)  $\gamma$  Pn

P 0.00000000 0.08571784 10.35762000

P 0.00000000 2.42022295 10.35762000

P 1.63500000 2.84991784 11.84238000

P 1.63500000 5.18442295 11.84238000

a=3.27 Å, b= 5.528 Å.

(D)  $\delta$  Pn

P 0.03061958 0.47983824 10.40284000

P 0.03061958 2.79288784 10.40284000

P 2.21229374 5.61129348 10.40284000

P 2.21229374 3.29823260 10.40284000

P 2.80061404 0.47983260 12.52716000

P 2.80061404 2.79289348 12.52716000

|   |            |            |             |
|---|------------|------------|-------------|
| P | 4.98228820 | 5.61128784 | 12.52716000 |
| P | 4.98228820 | 3.29823824 | 12.52716000 |

a=5.54 Å, b= 5.5368 Å.

(E)  $\zeta$  Pn

|   |            |            |            |
|---|------------|------------|------------|
| P | 0.58378578 | 3.69027624 | 6.74649000 |
| P | 2.30621422 | 3.69027624 | 8.25351000 |
| P | 5.19621422 | 5.63972376 | 6.74649000 |
| P | 3.47378578 | 5.63972376 | 8.25351000 |
| P | 5.19621422 | 2.52972376 | 8.25351000 |
| P | 3.47378578 | 2.52972376 | 6.74649000 |
| P | 0.58378578 | 0.58027624 | 8.25351000 |
| P | 2.30621422 | 0.58027624 | 6.74649000 |

a=5.78 Å, b= 6.22 Å.

2. Fully calcinated structures of alpha, gamma and delta phases of phosphorene.

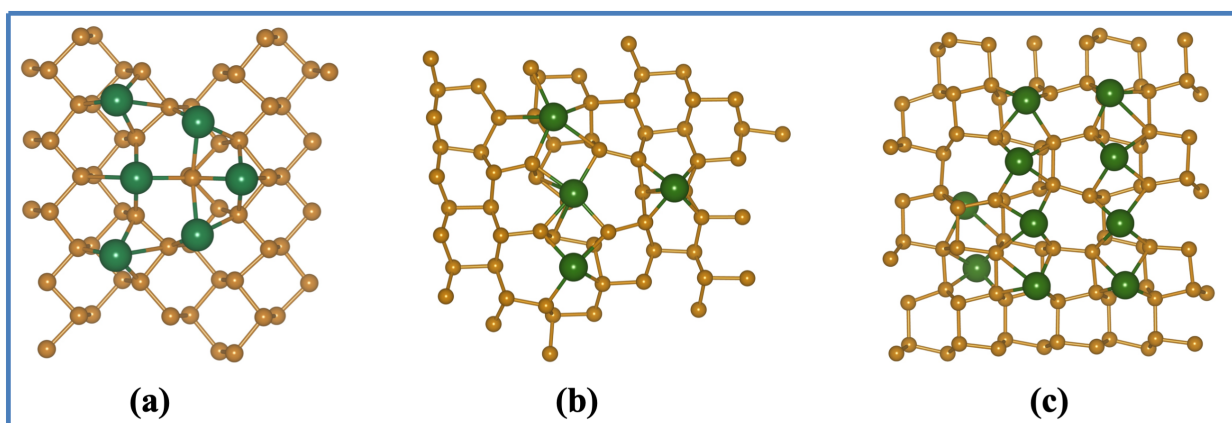

**Figure S1:** Fully calcium intercalated (a) alpha ( $Ca_{0.125}P$ ) (b) gamma ( $Ca_{0.083}P$ ) and (c) delta-phases ( $Ca_{0.139}P$ ) of phosphorene.

3. Variation of binding energy with Ca content of  $\delta$ -phase of phosphorene.

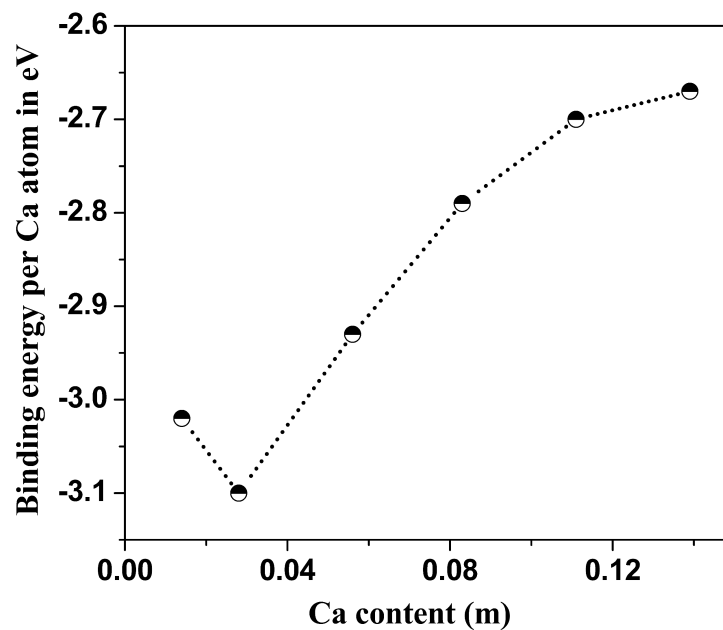

**Figure S2:** Variation of binding energy with Ca content of  $\delta$ -phase of phosphorene.

4. Detailed minimum energy pathway for Ca diffusion along armchair and zigzag direction of  $\alpha$ -allotrope.

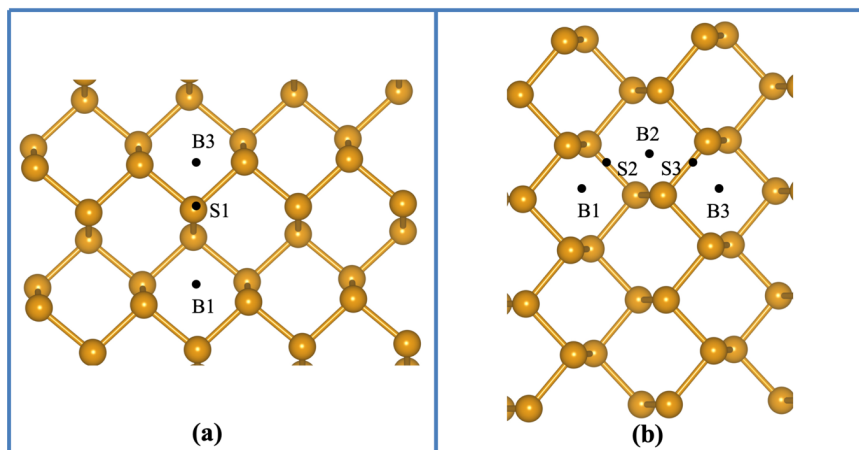

**Figure S3:** Detailed minimum energy pathway for Ca diffusion along (a) armchair and (b) zigzag direction of  $\alpha$ -allotrope.

5. Detailed minimum energy pathway for Ca diffusion along zigzag direction of  $\gamma$ -phase.

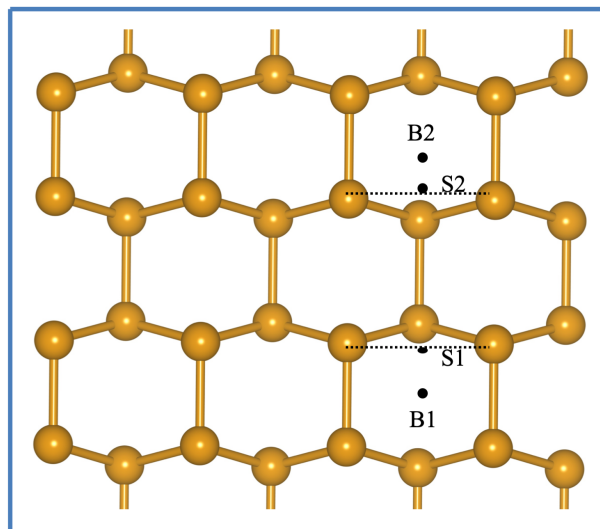

*Figure S4: Detailed minimum energy pathway for Ca diffusion along zigzag direction of  $\gamma$ -phase.*

6. Structures of saddle points during diffusion of Ca along zigzag direction of  $\gamma$ -allotrope.

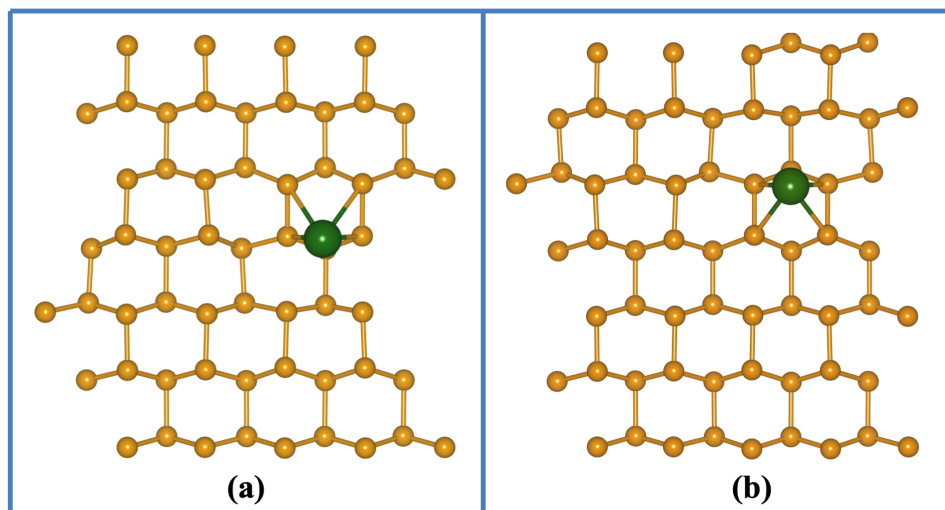

*Figure S5: Structures of saddle points during diffusion of Ca along zigzag direction of  $\gamma$ -allotrope.*

7. Convergence test of  $k$ -point mesh for  $\alpha$ -phase.

**Table S1:**

| k-point grid          | Binding energy of Ca (eV) |
|-----------------------|---------------------------|
| $4 \times 4 \times 1$ | -2.47                     |
| $5 \times 5 \times 1$ | -2.56                     |
| $6 \times 6 \times 1$ | -2.57                     |
| $7 \times 7 \times 1$ | -2.57                     |

8. Cartesian co-ordinates for the structures generated using evolutionary structure prediction algorithm with lattice parameters and their corresponding energies calculated using plane wave methods (DFT-D2).

**(A)  $\text{Ca}_3\text{P}_2$**

|    |             |            |            |
|----|-------------|------------|------------|
| Ca | 1.15787216  | 2.04312495 | 3.51284057 |
| Ca | -1.21243905 | 3.37523322 | 5.92647873 |
| Ca | 3.52124304  | 0.69305972 | 1.10052338 |
| P  | 3.45642802  | 0.65932947 | 5.13576165 |
| P  | -1.15249264 | 3.41000164 | 1.89283692 |

$a=4.71587 \text{ \AA}$ ,  $b=4.67724 \text{ \AA}$ ,  $c=7.06422 \text{ \AA}$ ;  $\alpha=90.01012^\circ$ ,  $\beta=90.37836^\circ$ ,  $\gamma=119.66444^\circ$

**(B)  $\text{Ca}_4\text{P}_4$**

|    |            |            |            |
|----|------------|------------|------------|
| Ca | 3.53996500 | 1.24847404 | 1.42515848 |
|----|------------|------------|------------|

|    |             |            |            |
|----|-------------|------------|------------|
| Ca | 1.75432561  | 2.88798059 | 6.27057140 |
| Ca | -0.70083202 | 1.82703063 | 8.41881815 |
| Ca | 1.08728531  | 0.19583187 | 3.57674680 |
| P  | 0.76903033  | 2.49117517 | 1.62606960 |
| P  | 2.06712885  | 0.59418142 | 8.22343758 |
| P  | 0.72005110  | 0.11943845 | 6.47468850 |
| P  | 2.13234752  | 2.94530734 | 3.36984990 |

a=5.40778 Å, b= 4.34652 Å, c= 9.89737 Å;  $\alpha$ = 88.64252°,  $\beta$ = 101.36213°,  $\gamma$ = 113.32098°

**(C) Ca<sub>4</sub>P<sub>7</sub>**

|    |            |            |            |
|----|------------|------------|------------|
| Ca | 2.43790297 | 1.63109014 | 2.24649235 |
| Ca | 4.89066066 | 4.44336398 | 0.89155278 |
| Ca | 0.34790886 | 3.98183007 | 4.40389390 |
| Ca | 2.95420825 | 6.56919385 | 5.93952265 |
| P  | 1.54885006 | 1.23747806 | 5.14160296 |
| P  | 1.96770702 | 4.52512333 | 1.96137314 |
| P  | 2.08493941 | 2.79519410 | 6.61037958 |
| P  | 5.15645472 | 1.55999543 | 0.26268710 |
| P  | 3.50280414 | 5.49559017 | 3.22926379 |
| P  | 5.34513193 | 1.90943731 | 2.42031792 |
| P  | 4.06142577 | 3.82922666 | 6.30830911 |

a=6.0205 Å, b= 5.858445 Å, c= 7.36062 Å;  $\alpha$ = 79.61485°,  $\beta$ = 84.77111°,  $\gamma$ = 104.7499°

**(D) Ca<sub>4</sub>P<sub>12</sub>**

|    |            |             |            |
|----|------------|-------------|------------|
| Ca | 1.85884834 | 1.69035540  | 0.68039477 |
| Ca | 4.34027544 | 1.78972195  | 4.03322197 |
| Ca | 3.68179458 | 5.19632801  | 8.25901051 |
| Ca | 0.55540068 | 5.48701196  | 4.82032306 |
| P  | 4.29303965 | 1.51282094  | 7.42753719 |
| P  | 2.42073687 | 1.89949357  | 6.29955982 |
| P  | 1.13844544 | 5.57178922  | 1.50840706 |
| P  | 3.02821616 | 5.45302699  | 2.72776458 |
| P  | 3.95486646 | 7.25046115  | 1.76534884 |
| P  | 0.29556184 | 3.72378196  | 2.43016009 |
| P  | 1.42706901 | 3.44108877  | 7.48613515 |
| P  | 4.12683387 | 7.13289026  | 6.11379995 |
| P  | 1.90642946 | -0.23829308 | 6.76185625 |
| P  | 5.20786590 | 3.26846986  | 6.48848787 |
| P  | 3.92635182 | 3.69291687  | 1.66874164 |
| P  | 0.31699858 | 7.35776711  | 2.54443631 |



$a=5.7076 \text{ \AA}$ ,  $b= 7.47315 \text{ \AA}$ ,  $c= 8.89302 \text{ \AA}$ ;  $\alpha= 92.2923^\circ$ ,  $\beta= 92.92014^\circ$ ,  $\gamma= 89.69074^\circ$

9. Phonon spectrums of other two structures originated from evolutionary structure prediction algorithm.

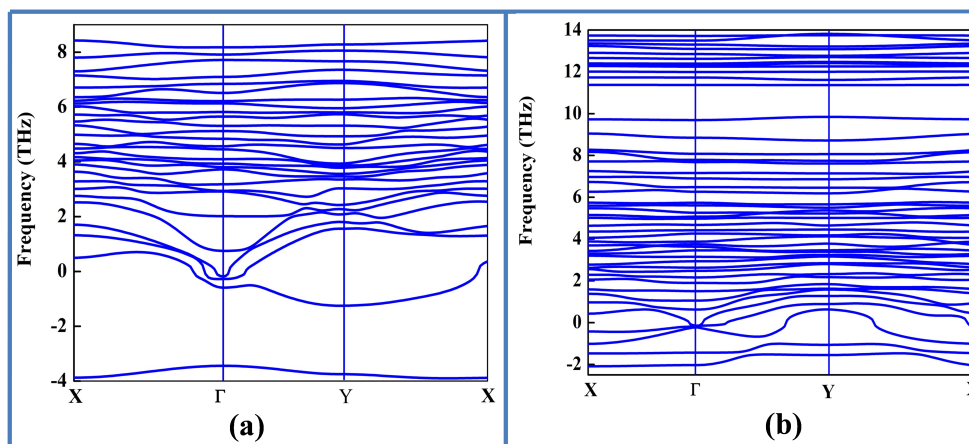

*Figure S6: Phonon dispersion curve of (a)  $\text{Ca}_4\text{P}_7$  and (b)  $\text{Ca}_4\text{P}_{12}$  phases*

10. Convex curve taking possible phases of all the 2319 structures.

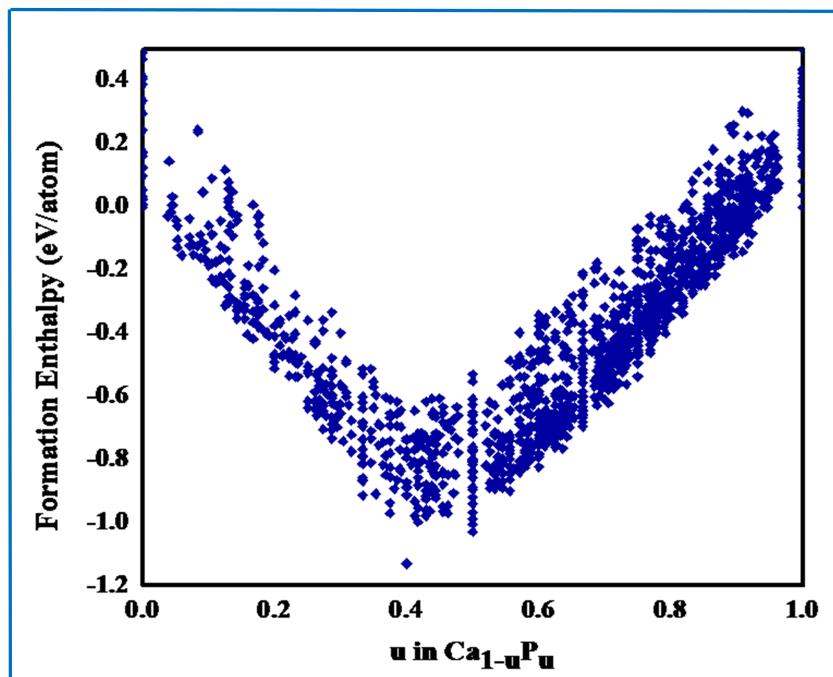

*Figure S7: Convex curve taking all possible 2319 structures.*

## 11. RMSD plots for $\text{Ca}_3\text{P}_2$ and $\text{Ca}_4\text{P}_4$

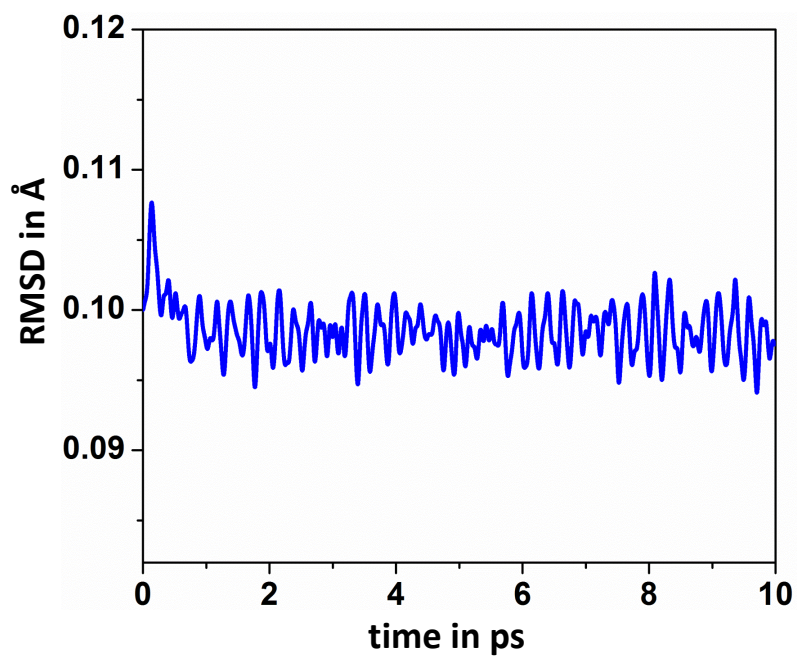

*Figure S8:* Plot of RMSD with time for  $\text{Ca}_3\text{P}_2$  at 300 K.

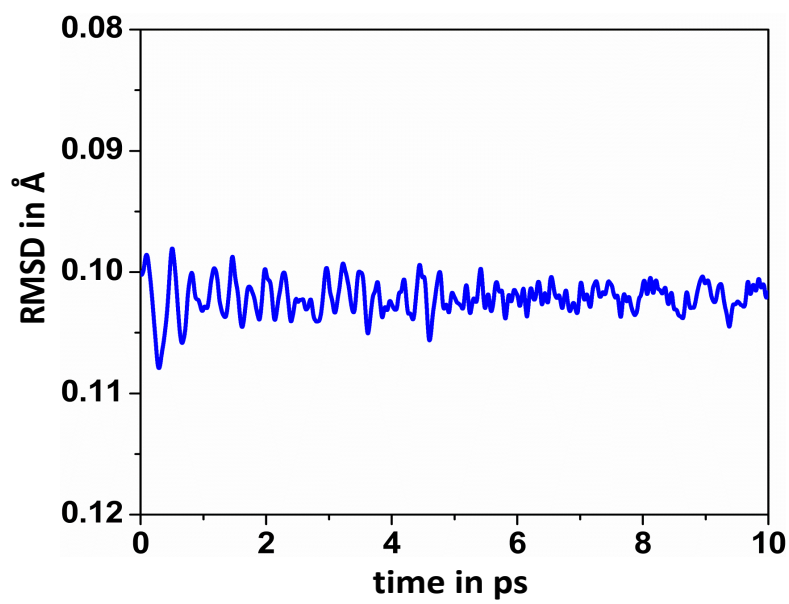

*Figure S9:* RMSD plot for  $\text{Ca}_4\text{P}_4$  at 300 K.
